# Supplementary material for: Robust organohydrogel with flexibility and conductivity across the freezing and boiling temperatures of water
Source: Royal Society of Chemistry journal article supplement (doi:10.1039/c9cc04239c), 2019-01-01
Supplement: c9cc04239c1.pdf [file c9cc04239c1.pdf]

## Supporting Information

### **Robust organohydrogel with flexibility and conductivity across freezing and boiling temperature of water**

*Dongyang Lou, Congsen Wang, Zhiyong He, Xiaoyi Sun\*, Jiasheng Luo and Juan Li\**

College of Chemistry and Chemical Engineering, Central South University, 932 Lushan Road,  
Changsha, Hunan 410083, China

Corresponding authors: xiaoyisun@csu.edu.cn (X. Sun), juanli@csu.edu.cn (J. Li).

## **Experimental section**

### **Materials**

2-Acrylamido-2-methylpropanesulfonic acid (AMPS, 99%) and acrylamide (AAm, 98%) were purchased from Energy Chemical Co. Ltd. and recrystallized from methanol and chloroform, respectively. Lithium chloride monohydrate ( $\geq 97.0\%$ ) and ethylene glycol ( $\geq 99.0\%$ ) were purchased from Sinopharm Chemical Reagent Co. Ltd. (Shanghai, China) and used as received. Ammonium persulfate (APS, 98%) and N,N'-methylenebisacrylamide (MBAA, 97%) were purchased from Acros and Alfa-Aesar, respectively. N,N,N',N'-Tetramethylethylenediamine (TEMED, 99%) and 2-oxoglutaric acid (98%) were supplied by Energy Chemical Co. Ltd.. All other reagents were purchased from commercial sources and used as received.

### **Preparation of HGel**

Typically, AMPS (1.036 g), MBAA (30.833 mg) and APS (18.256 mg) were dissolved completely in 5 mL deionized water. Then, TEMED (7  $\mu\text{L}$ ) was added into the above solution in an ice bath. After purged with nitrogen for 5 min to remove the dissolved oxygen, the mixture was reacted at 60 °C for 2 h and then continued at room temperature overnight. Subsequently, the PAMPS gels were immersed into the aqueous mixture of AAm (2 M), 2-oxoglutaric acid (2 mM) and MBAA (2 mM) for a certain time until the swelling equilibrium. After irradiated with UV light (365 nm) for 3 h and then immersed in deionized water for 2 days to remove unreacted monomers and other impurities, the final PAMPS/PAAm hydrogel (referred as HGel) were obtained.

## **Preparation of OHGel**

Typically, PAMPS/PAAm hydrogel (about 3 g) were immersed in 30 mL pure ethylene glycol solution or ethylene glycol solution of lithium chloride at different concentrations (1 M, 2 M, 4 M, 8 M), respectively, until the weights of organohydrogels remained stable. The organohydrogels are referred as OHGel- $x$ , where  $x$  is the abbreviated LiCl concentration of  $x$  mol L<sup>-1</sup>.

## **Characterization**

### **Differential scanning calorimeter (DSC)**

The thermal analysis of the organohydrogels from -130 °C to 33 °C were performed on a Netzsch 200 F3 differential scanning calorimeter. The heating and cooling rates were 5 °C min<sup>-1</sup>.

The thermal analyses of hydrogel and organohydrogels from 25 °C to 250 °C were performed on a Netzsch STA 449F5 DSC. The heating rate was 10 °C min<sup>-1</sup>.

### **Thermogravimetric analysis (TGA)**

The thermogravimetric analyses of hydrogel and organohydrogels were performed on a TA Q500 thermogravimeter. The heating rate was 10 °C min<sup>-1</sup>.

### **Rheological characterization measurements**

The rheological property of organohydrogels and viscosity of EG/LiCl solution were tested by a rheometer (Anton Paar, 302, GmbH). The organohydrogels were prepared as thick sheets approximately 1 mm to determine the linear viscoelastic region using a frequency sweep mode.

The evolution of storage ( $G'$ ) and loss ( $G''$ ) moduli were given at 1.0% strain amplitude. The test temperature was 25 °C. The heating rate of rheological property of HGel and OHGel-8 (0 ~ 150 °C) were 2 °C min<sup>-1</sup>.

### **Characterization of the mechanical properties**

The compressive mechanical properties of organohydrogels were determined by an MTS Insight tensile-compressive test device (MTS Insight Electromechanical Testing System) at a compressive strain rate of 10 % min<sup>-1</sup>. Each cylindrical test sample was with a diameter of 10 mm and a height of 20 mm. The in-situ tensile strength measurements of hydrogel and organohydrogels were performed on an INSTRON 5966 tensile-compressive test device at -70 °C, 25 °C and 120 °C, respectively. The strain rate was 250 mm min<sup>-1</sup>.

### **Characterization of the anti-freezing and anti-drying properties**

The anti-freezing properties of organohydrogels were assessed through deformation by hands after stored in a refrigerator at -80 °C for 3 h. The anti-drying properties of organohydrogels were assessed on the weight loss after stored at an oven (120 °C, 10% humidity) or vacuum oven (25 °C), respectively.

### **Ion conductivity measurements**

A round-shape disk HGels and OHGels-8 (diameter of 15 mm) were tested by using electrochemical impedance spectroscopy measurements of CHI 660E, ChenHua Instruments. The tested ac potential amplitude was 0.5 V and the ionic conductivity ( $\sigma$ ) is calculated from formula (1).

$$\sigma = \frac{L}{RS} \tag{1}$$

where  $L$  represents the thickness,  $S$  is area of the film, and  $R$  is the resistance.

**Table S1.** Progress on working temperature of hydrogels or organohydrogels.

| No. | Gel network                                                                     | Key conditions                        | T <sub>min</sub> (°C) | T <sub>max</sub> (°C) | References                                                         |
|-----|---------------------------------------------------------------------------------|---------------------------------------|-----------------------|-----------------------|--------------------------------------------------------------------|
| 1   | <b>PAMPS/PAAm</b>                                                               | <b>ethylene glycol/LiCl</b>           | <b>-80 °C</b>         | <b>120 °C</b>         | <b>This work</b>                                                   |
| 2   | Polyacrylamide/alginate                                                         | CaCl <sub>2</sub>                     | -57 °C                | Not mentioned         | <i>Adv. Mater.</i> , 2018, 30, 1801541.                            |
| 3   | polyacrylamide                                                                  | LiCl                                  | -80 °C                | 25 °C (10% humidity)  | <i>Appl. Phys. Lett.</i> , 2014, 105, 151903.                      |
| 4   | cellulose                                                                       | ZnCl <sub>2</sub> /CaCl <sub>2</sub>  | -70 °C                | 25 °C                 | <i>Angew. Chem., Int. Ed.</i> , 2019, DOI: 10.1002/anie.201902578. |
| 5   | Ca-alginate/polyacrylamide                                                      | glycerol, ethylene glycol or sorbitol | -70 °C                | 20 °C (50% humidity)  | <i>Angew. Chem., Int. Ed.</i> , 2018, 130, 6678-6681.              |
| 6   | HPN/OPN heteronetworks                                                          | heptane                               | -78 °C                | 80 °C                 | <i>Nat. Commun.</i> , 2017, 8, 15911.                              |
| 7   | (PAM-co-PAA) networks with (PDA-CNTs)                                           | glycerol                              | -20 °C                | 60 °C                 | <i>Adv. Funct. Mater.</i> , 2018, 28, 1704195.                     |
| 8   | PVA polymer powders and poly(3,4-ethylenedioxythiophene): polystyrene sulfonate | ethylene glycol                       | -55 °C                | 45 °C                 | <i>Angew. Chem., Int. Ed.</i> , 2017, 129, 14347-14351.            |

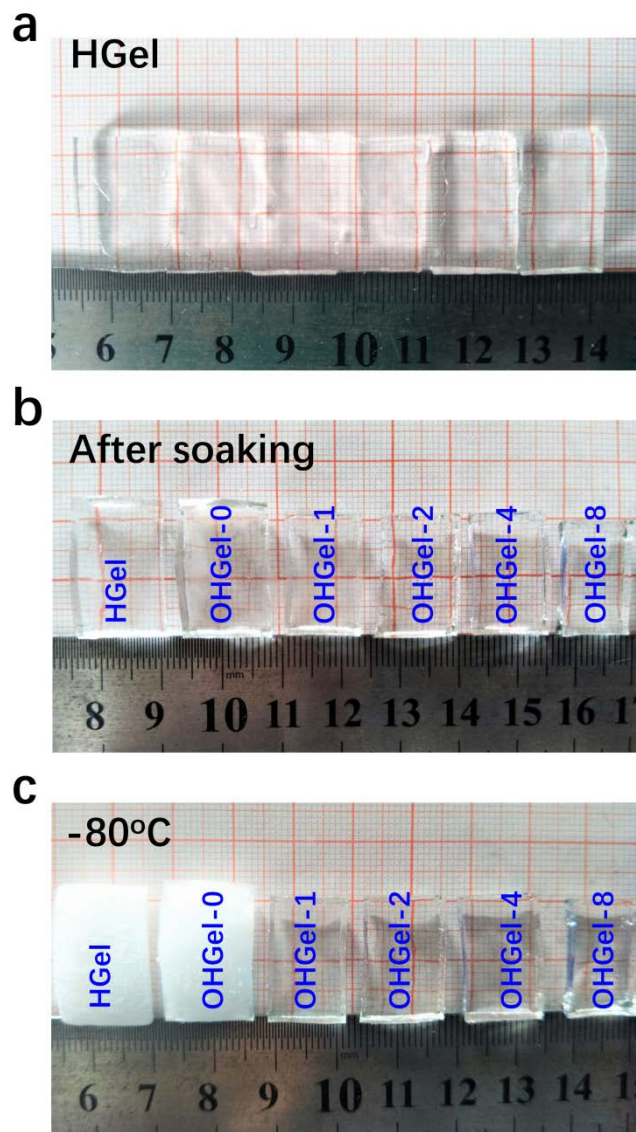

**Figure S1.** Photos of (a) PAMPS/PAAm hydrogels, (b) organohydrogels after soaking in EG/LiCl for 7 days and (c) stored at  $-80\text{ }^{\circ}\text{C}$  for 3 h.

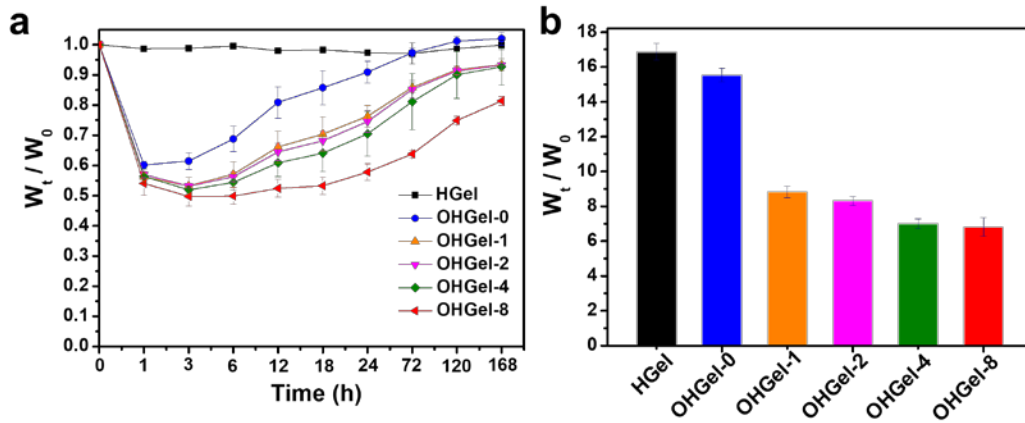

**Figure S2.** (a) Weight change of pristine hydrogel as a function of time during soaking in different EG/LiCl solutions. (b) Swelling ratios of hydrogel and organohydrogels after immersing a lyophilized hydrogel in water or different EG/LiCl solutions until equilibrium.

The weights of hydrogel and organohydrogels were measured after the surface solvent on gel was removed with filter paper. The swelling method took a longer time (e. g. about one month for OHGel-8) to reach the equilibrium to obtain anti-freezing organohydrogels than the solvent displacement method.



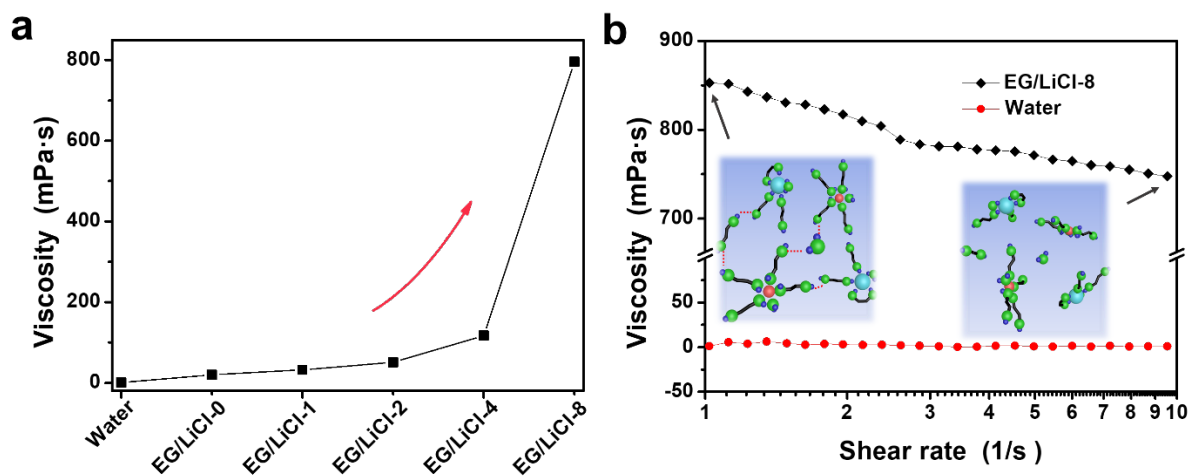

**Figure S3.** (a) Viscosity of water and EG/LiCl solution. (b) Viscosity of EG/LiCl-8 solution as a function of shear rate (Inserted image shows the interaction between solvent molecules).

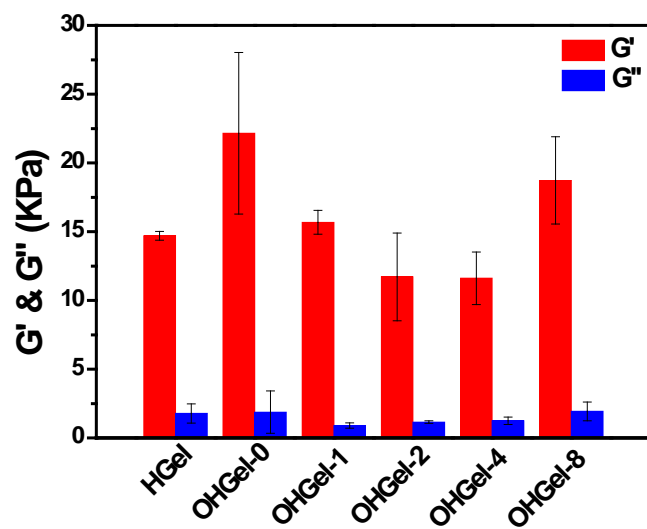

**Figure S4.** G' and G'' of hydrogels and organohydrogels ( $\gamma = 1.0 \%$ ,  $\omega = 50 \text{ rad/s}$ ,  $25 \text{ }^\circ\text{C}$ ).

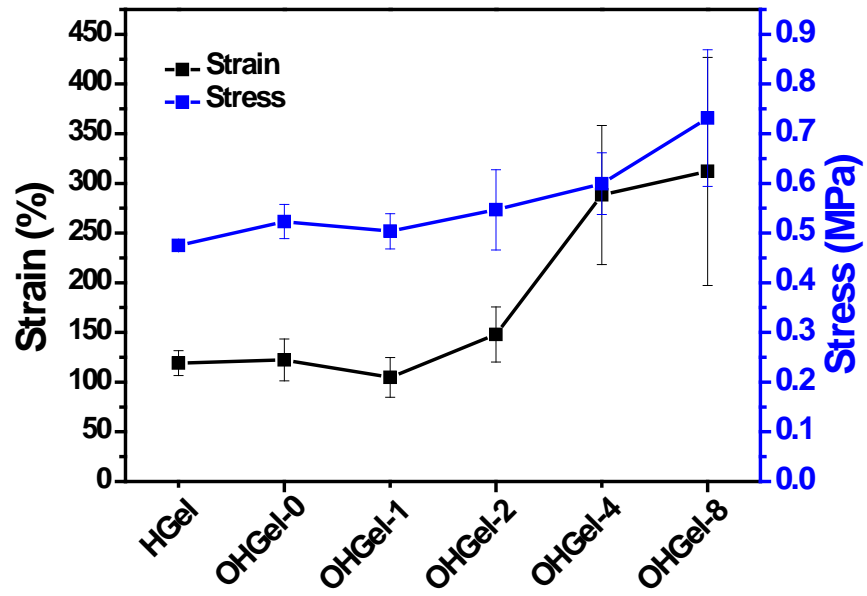

**Figure S5.** Tensile mechanical properties of the hydrogel and organohydrogels (25 °C).

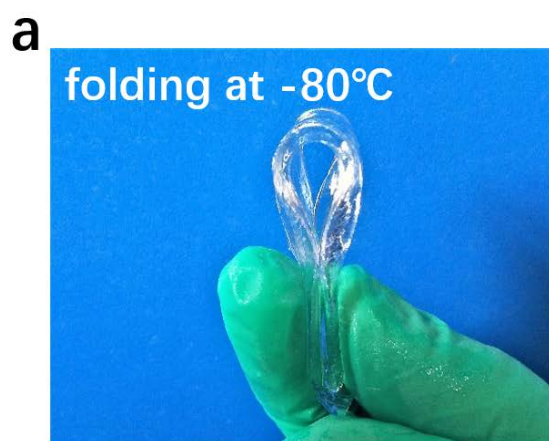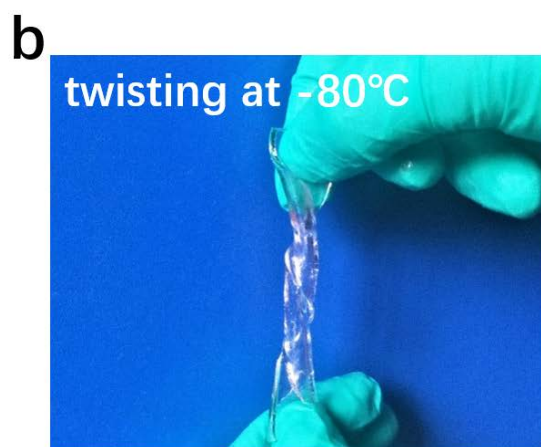

**Figure S6.** Photos of OHGel-8 after (a) folding and (b) twisting at  $-80^{\circ}\text{C}$ .

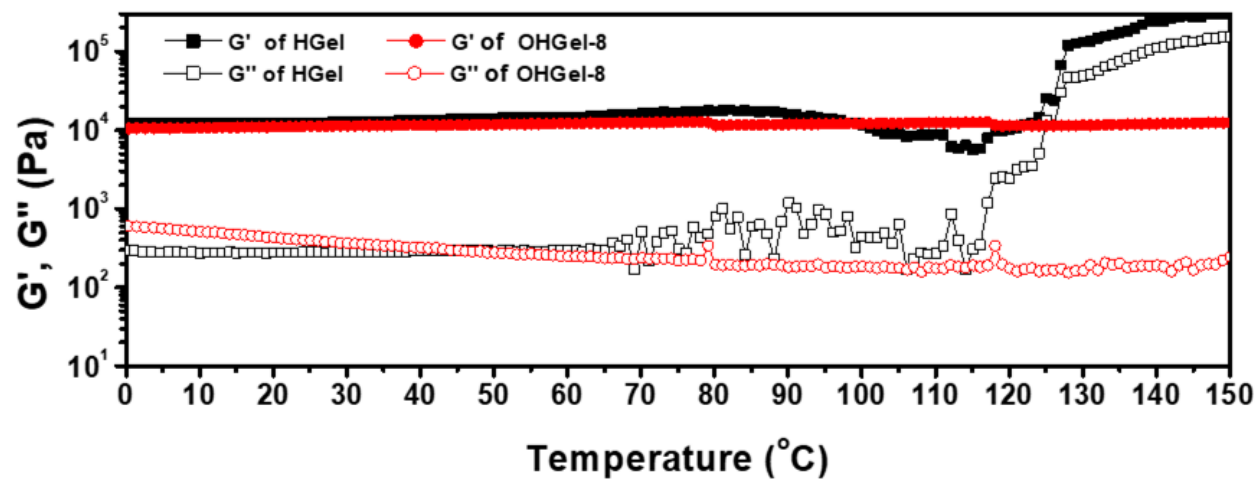

**Figure S7.**  $G'$  and  $G''$  of HGel and OHGel-8 at temperature from 0 °C to 150 °C.

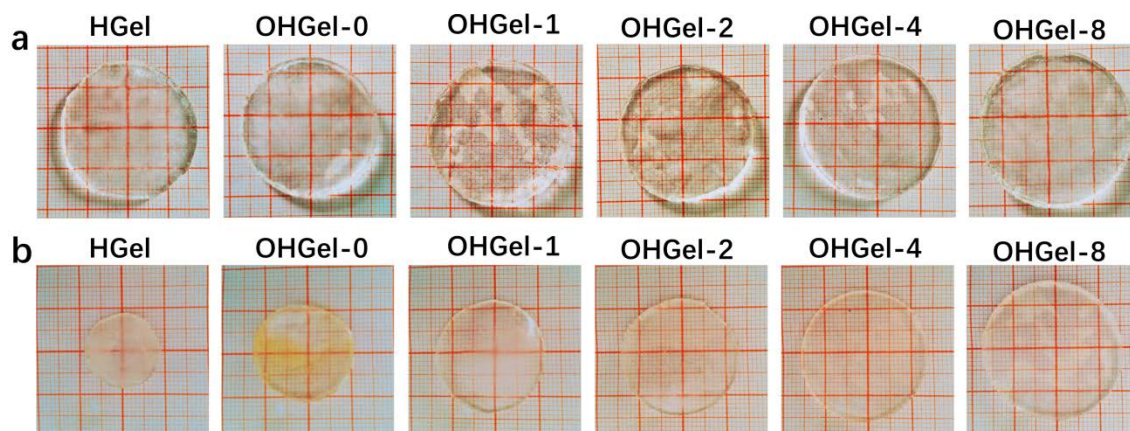

**Figure S8.** Photos of HGel and OHGels (a) as-prepared and (b) after heating at 120 °C and 10% humidity for 3 h.

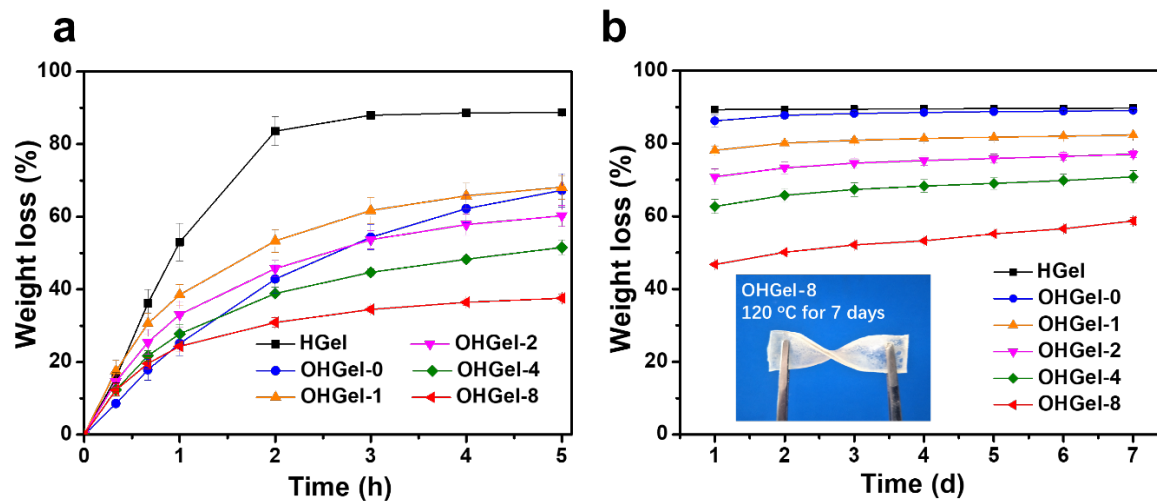

**Figure S9.** Anti-drying properties of the organohydrogels. Weight loss of organohydrogels as a function of time during drying at 120 °C and 10% humidity (a) in the beginning 5 h, and (b) during the 7 days incubation. Inset: flexibility of OHGel-8 after heating at 120 °C and 10% humidity for 7 days.

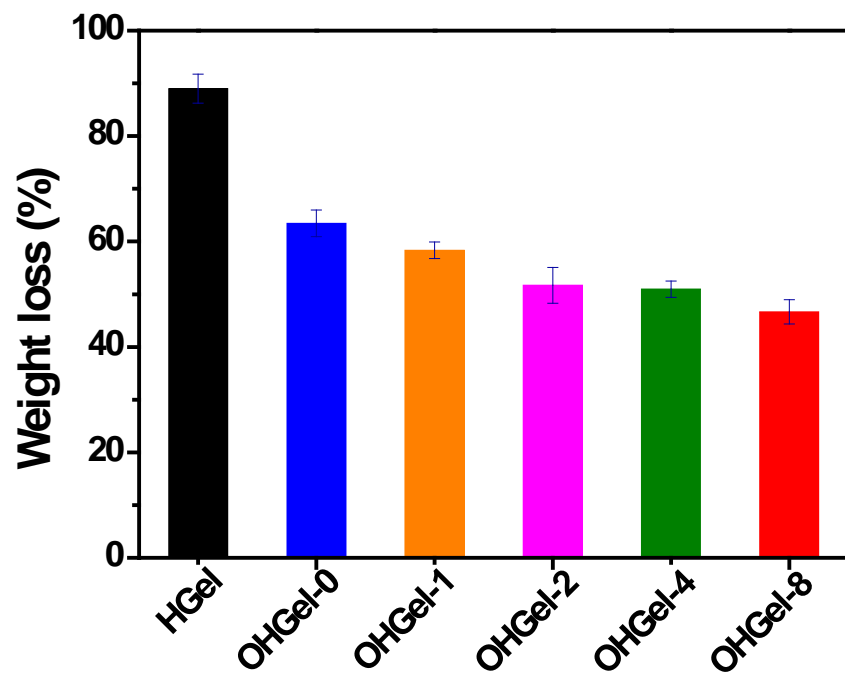

**Figure S10.** Weight loss of hydrogel and organohydrogels after drying in vacuum for 24 h.



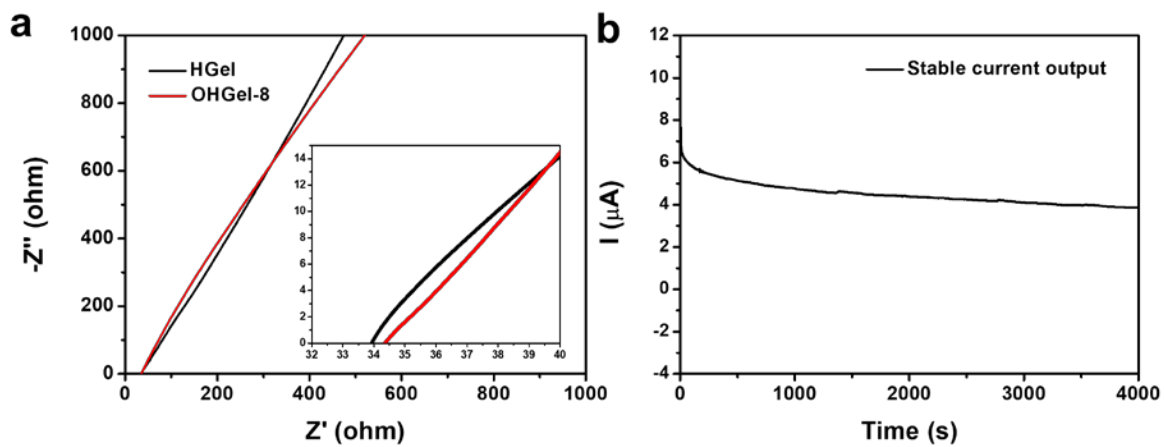

**Figure S11.** (a) Typical “Nyquist” plot of HGel and OHGel-8 at 25 °C. (b) The stability of ionic conductivity of OHGel-8.

**Table S2.** Ionic conductivity of HGel, OHGel-0 and OHGel-8 after incubation at  $-20\text{ }^{\circ}\text{C}$ ,  $25\text{ }^{\circ}\text{C}$  and  $120\text{ }^{\circ}\text{C}$  for 3 h, respectively.

| <b>Temperature</b>            | <b>HGel</b>           | <b>OHGel-0</b> | <b>OHGel-8</b>         |
|-------------------------------|-----------------------|----------------|------------------------|
| $-20\text{ }^{\circ}\text{C}$ | N.D. <sup>a</sup>     | N.D.           | $0.071\text{S m}^{-1}$ |
| $25\text{ }^{\circ}\text{C}$  | $0.51\text{S m}^{-1}$ | N.D.           | $0.51\text{S m}^{-1}$  |
| $120\text{ }^{\circ}\text{C}$ | N.D.                  | N.D.           | $7.7\text{S m}^{-1}$   |

<sup>a</sup>N.D. refers to that the conductivity is too low to be detected.
